# Supplementary material for: Multidimensional regulation of gene expression in the C. elegans embryo
Source: HighWire-hosted journal article supplement (doi:10.1101/gr.131920.111), 2012-04-16
Supplement: SuppLegends.docx [file SuppLegends.docx]

**Supplemental Figure 1:** **Expression Statistics**. A. Histogram showing the distribution of earliest onset time for all promoter-fusion reporter embryos, showing that these are distributed broadly over a 2-hour range. The 350-cell stage corresponds to about 250 minutes, and the reduction in expression onset after 200 minutes is likely a result of our focus on reporters with earlier expression. B. Histogram showing how many embryos (of all reporter constructs, averaged within replicates of the same construct) show expression in different numbers of leaf cells or their ancestors: 165/244 (68%) of embryos were expressed in specific patterns of fewer than 400 cells

**Supplemental Figure 2: Calculation of peak expression values.**  This schematic shows (for an extreme example of dynamic expression) how the process of calculating “peak” expression values works. First data are temporally smoothed. Then, the highest (smoothed) expression value in each cell’s lineage history is chosen as its peak expression (green arrows).

**Supplemental Figure 3: Full-resolution cluster.** This expanded version of Fig. 1C includes all gene and construct names.

**Supplemental Figure 4: Cells of related lineages are more similar in expression than cells giving rise to the same fate.** A. All cells are arranged by two-dimensional clustering (using TRN function in MeV with background lightened from black in Adobe Photoshop) based on their gene expression and then colored based on their lineage of origin. Each dot represents a cell and they are placed such that cells with similar expression are close to each other. The clusters formed by this method each contain cells arising from a single lineage. B. The same cluster diagram as in panel A, except that the cells are colored by their terminal fate. Clusters are noticeably more heterogeneous with respect to fate than to lineage.

**Supplemental Figure 5: *pop-1* RNAi causes expression changes in the AB lineage.** Full AB lineages for 9 genes, with AB-lineage expression compared between wild type and *pop-1* RNAi.

**Supplemental Figure 6: *pop-1* RNAi causes expression changes in the P1 lineage.** P1, EMS or P2 lineages for 6 genes with expression in those lineages compared between wild type and *pop-1* RNAi.

**Supplemental Table 1: Strains analyzed for expression**

**Supplemental Table 2: Embryos analyzed by lineage analysis (with stats, A-P lineage, fate, position bias)**

**Supplemental Table 3: Literature comparison**

**Supplemental Table 4: Replicate similarity values**

**Supplemental Table 5: Lineage-correlated expression**

**Supplemental Table 6: Position-specific genes**

**Supplemental Table 7: Asymmetric expression**

**Supplemental Table 8: Multidimensional expression contributions**

**Supplemental Dataset 1: Spreadsheet of all reporters expressed in each cell sorted by what fraction of that reporter’s expression is in that cell**

**Supplemental Poster: Full poster-sized lineage block diagram.** Each branch includes a group of reporters that distinguish that cell’s daughters (or later descendants). For example, maternal *PAL-1* (protein-fusion) reporter is preferentially retained in P1 relative to AB, P1’s daughters are distinguished by *med-1* and *pal-1* zygotic (promoter-fusion) reporters, AB’s daughters are distinguished by *tbx-37, tbx-38* and *hlh-26* reporters, and so on. Patterns selected for display were identified as differentially expressed in a lineage (based on Supplemental Table 5), with additional patterns chosen by manual curation. For replicates, one tree was chosen that was judged representative, with the number of replicates agreeing with the displayed pattern by visual inspection indicated where applicable. In some cases additional expression occurs outside the labeled lineages (either broadly or specifically in other lineages) so this poster should be used as a screening tool, followed by a detailed check of the full expression trees and replicates.
